# Supplementary material for: Quantitative mapping of DNA phosphorothioatome reveals phosphorothioate heterogeneity of low modification frequency
Source: PubMed Central journal article supplement (PMC6459556; doi:10.1371/journal.pgen.1008026), 2019-04-01
Supplement: pgen.1008026.s004.pdf [file pgen.1008026.s004.pdf]

1 **S2 Table. Statistics analysis of PT modification at representative sites with gradient**  
 2 **increase of sequencing depth.** Each specific site displayed here is to exemplify the different  
 3 detected PT modification situations with the gradient sequencing depth.

| Position | Pattern | 200 ×                                 | 400 × | 600 × | 800 × | 1000 × |
|----------|---------|---------------------------------------|-------|-------|-------|--------|
|          |         | Depth of reads ended at specific site |       |       |       |        |
| 33670    | GTTC    | 63                                    | 121   | 174   | 226   | 282    |
| 3865     | GAAC    | 47                                    | 67    | 105   | 150   | 175    |
| 19366    | GAAC    | 19                                    | 32    | 59    | 79    | 104    |
| 5390     | GTTC    | 11                                    | 31    | 41    | 61    | 90     |
| 1138     | GTTC    | 14                                    | 25    | 34    | 38    | 53     |
| 301      | GTTC    | 8                                     | 15    | 18    | 23    | 39     |
| 614      | GTTC    | 0                                     | 0     | 0     | 0     | 0      |

4
