# Supplementary material for: Quantitative mapping of DNA phosphorothioatome reveals phosphorothioate heterogeneity of low modification frequency
Source: PubMed Central journal article supplement (PMC6459556; doi:10.1371/journal.pgen.1008026), 2019-04-01
Supplement: pgen.1008026.s005.pdf [file pgen.1008026.s005.pdf]

1 **S3 Table. The ended reads number at randomly selected 10 non GAAC/GTTC sites.** The  
 2 ended reads number at randomly selected 10 non GAAC/GTTC sites maintained almost zero  
 3 and didn't increase with the sequencing depth increased.

| Position | Pattern | 200 ×                                 | 400 × | 600 × | 800 × | 1000 × |
|----------|---------|---------------------------------------|-------|-------|-------|--------|
|          |         | Depth of reads ended at specific site |       |       |       |        |
| 368      | CCGA    | 0                                     | 0     | 0     | 0     | 2      |
| 2042     | TTGA    | 0                                     | 0     | 0     | 0     | 0      |
| 2357     | ACGG    | 0                                     | 0     | 0     | 0     | 0      |
| 3144     | AGGC    | 0                                     | 0     | 0     | 0     | 0      |
| 5147     | GCGT    | 0                                     | 0     | 0     | 0     | 0      |
| 8661     | CAAC    | 0                                     | 2     | 2     | 3     | 5      |
| 13139    | TTTC    | 2                                     | 3     | 2     | 0     | 1      |
| 21699    | ACCG    | 0                                     | 0     | 0     | 0     | 0      |
| 25667    | CAGT    | 0                                     | 0     | 0     | 0     | 0      |
| 30950    | ATAC    | 0                                     | 0     | 0     | 0     | 0      |

4
