# Supplementary material for: Quantitative mapping of DNA phosphorothioatome reveals phosphorothioate heterogeneity of low modification frequency
Source: PubMed Central journal article supplement (PMC6459556; doi:10.1371/journal.pgen.1008026), 2019-04-01
Supplement: pgen.1008026.s008.pdf [file pgen.1008026.s008.pdf]

1 **S6 Table. Overlapped PT modified sites with different modification frequency of PT-IC-**  
2 **seq and ICDS approach with 200 × coverage.**

| PT ratio | Sites number | Overlaped with 200 × | Percentage |
|----------|--------------|----------------------|------------|
| ≥30      | 360          | 353                  | 98.06      |
| ≥25      | 1608         | 1596                 | 99.25      |
| ≥20      | 2718         | 2699                 | 99.30      |
| ≥15      | 3714         | 3673                 | 98.90      |
| ≥10      | 5379         | 5261                 | 97.81      |
| ≥6       | 8725         | 7750                 | 88.83      |

3
