# Supplementary material for: Quantitative mapping of DNA phosphorothioatome reveals phosphorothioate heterogeneity of low modification frequency
Source: PubMed Central journal article supplement (PMC6459556; doi:10.1371/journal.pgen.1008026), 2019-04-01
Supplement: pgen.1008026.s009.pdf [file pgen.1008026.s009.pdf]

1 **S7 Table. Analysis of consensus sequences in *E. coli* B7A**

| GAAC/GTTC     |   | Downstream base   |                   |                    |                   |
|---------------|---|-------------------|-------------------|--------------------|-------------------|
|               |   | A                 | C                 | G                  | T                 |
| Upstream base | A | 2.78%<br>(10/360) | 4.17%<br>(15/360) | 23.61%<br>(85/360) | 5.56%<br>(20/360) |
|               | C | 3.61%<br>(13/360) | 4.17%<br>(15/360) | 11.67%<br>(42/360) | 3.89%<br>(14/360) |
|               | G | 3.89%<br>(14/360) | 2.78%<br>(10/360) | 21.67%<br>(78/360) | 5%<br>(18/360)    |
|               | T | 0.28%<br>(1/360)  | 1.39%<br>(5/360)  | 4.72%<br>(17/360)  | 0.83%<br>(3/360)  |

2

3
