# Supplementary material for: Quantitative mapping of DNA phosphorothioatome reveals phosphorothioate heterogeneity of low modification frequency
Source: PubMed Central journal article supplement (PMC6459556; doi:10.1371/journal.pgen.1008026), 2019-04-01
Supplement: pgen.1008026.s010.pdf [file pgen.1008026.s010.pdf]

1 **S8 Table. DNA primers and probes used in PT-IC-ddPCR**

| Site | Genome position | Primer/ probes | Primer sequence (5'-3')               | Product size (bp) |
|------|-----------------|----------------|---------------------------------------|-------------------|
| G1   | 21687           | G1-F           | GACCCAGTATGTCAACCCAACC                | 142               |
|      |                 | G1-R           | GGAATTCTGGACCGCTGTCG                  |                   |
|      |                 | G1P            | ACAAACCACCACCGATAATGTTGCCGATC         |                   |
| G2   | 607710          | G2-F           | GATGGCTTCGTTAAGTGTTAGTCC              | 109               |
|      |                 | G2-R           | GCTGACTCTGACATTATGGTATCG              |                   |
|      |                 | G2P            | CCTGTTCTCACCGCATGGTCAACGCC            |                   |
| G3   | 1201555         | G3-F           | TGGCAATTCATATATGGCCTGAC               | 134               |
|      |                 | G3-R           | TGAAGTGCTACTCCCCTTTGTG                |                   |
|      |                 | G3P            | CTGGAAAACCCGCCTCACGCATCATAAATG        |                   |
| G4   | 1818096         | G4-F           | ACGCAATTCACGTACTGACATG                | 124               |
|      |                 | G4-R           | AAAAGCCAAACTTTTCGAATTAATGAC           |                   |
|      |                 | G4P            | ATCAACATCGTCAAGCGTCATGCCGG            |                   |
| G5   | 3592199         | G5-F           | AAGACTCAACTGTTTAATGAGATGTGG           | 98                |
|      |                 | G5-R           | TGAAACGGGTCATGCTCTAATCC               |                   |
|      |                 | G5P            | CAGCCTTCATTGCGGGAGTTAATCCAGGAAC       |                   |
| G6   | 4585867         | G6-F           | TGTTGATGGTAGTAACGACTTTGC              | 140               |
|      |                 | G6-R           | GTATCCCATGCGGGTATCCTG                 |                   |
|      |                 | G6P            | CTTTTCGCCCCTGGATGGAGCAAACCC           |                   |
| G7   | 3026955         | G7-F           | ATCAGAGAGAGAAGACCGAAACC               | 119               |
|      |                 | G7-R           | CCACGAGTACACCTCTCCTTAG                |                   |
|      |                 | G7P            | TCATCGTGAATCCATTAGACTTAGAAAATATCGGGTC |                   |
| G8   | 4120753         | G8-F           | TAAAGATGGATGGGCAGATCGG                | 144               |
|      |                 | G8-R           | GGATCACGAAAAGTATCTCTGGAC              |                   |
|      |                 | G8P            | CGCCTCGTTCGCCTTTGCCGCC                |                   |

2
