# Supplementary material for: Quantitative mapping of DNA phosphorothioatome reveals phosphorothioate heterogeneity of low modification frequency
Source: PubMed Central journal article supplement (PMC6459556; doi:10.1371/journal.pgen.1008026), 2019-04-01
Supplement: pgen.1008026.s011.pdf [file pgen.1008026.s011.pdf]

1 **S9 Table. 8 loci of the genome of *E. coli* B7A quantified PT modification frequency.** Eight  
2  $G_{ps}AAC/G_{ps}TTC$  loci on the genome of *E. coli* B7A were randomly selected to test the  
3 phosphorothioate modification frequency by PT-IC-ddPCR and PT-IC-qPCR. And compared  
4 with the modification frequency obtained by PT-IC-seq.

| Genome position | Type     | Function             | Subsystems                                                    | PT frequency (%) |           |
|-----------------|----------|----------------------|---------------------------------------------------------------|------------------|-----------|
|                 |          |                      |                                                               | PT-IC-ddPCR      | PT-IC-seq |
| 21687           | Gene     | formate transporter  | Inorganic ion transport and metabolism                        | 30.35            | 25.87     |
| 607710          | Gene     | benzoate transporter | Secondary metabolites biosynthesis, transport, and catabolism | 46.43            | 28.44     |
| 1201555         | Gene     | hypothetical protein | Cell envelope biogenesis, outer membrane                      | 49.69            | 32.63     |
| 1818096         | Gene     | Gp41                 | Glycoprotein                                                  | 8.78             | 5.19      |
| 3592199         | Gene     | EnvR                 | DNA-binding transcriptional regulator                         | 47.55            | 31.01     |
| 4585867         | Gen      | putative protease    | Posttranslational modification, protein turnover, chaperones  | 39.00            | 29.29     |
| 3026955         | Promoter | Rep                  | ATP-dependent DNA helicase                                    | 12.1             | 5.45      |
| 4120753         | Gene     | hypothetical protein | Function unknown                                              | 15.49            | 9.55      |

5
